# Supplementary material for: Construct Validity and Reliability of the Work Environment Assessment Instrument WE-10
Source: PubMed Central journal article supplement (PMC7600521; doi:10.3390/ijerph17207364), 2020-10-09
Supplement: ijerph-17-07364-s001.pdf [file ijerph-17-07364-s001.pdf]

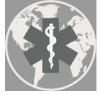

**Assessment of the Work Environment**  
**Assessment scale of the WE-10 (Work Environment)**

**Instructions**

This questionnaire concerns how you feel regarding the WE-10. It assesses questions on your **quality of life, quality of work life, and organizational climate**. Please, answer all of the questions. If you are not sure about your answer to a question, please choose the alternative that seems the most appropriate to you. We are asking how satisfied you are with several aspects of your life and work in the **past two weeks**. Select one of the alternatives and circle the number that best represents your opinion.

**1. Health:**

1.1. Regarding your health, in general, how do you feel?

|                     |             |                                         |           |                   |
|---------------------|-------------|-----------------------------------------|-----------|-------------------|
| Very<br>unsatisfied | Unsatisfied | Neither<br>satisfied nor<br>unsatisfied | Satisfied | Very<br>satisfied |
| 1                   | 2           | 3                                       | 4         | 5                 |

1.2. Regarding your disposition (energy, liveliness, vitality), how do you feel?

|                     |             |                                         |           |                   |
|---------------------|-------------|-----------------------------------------|-----------|-------------------|
| Very<br>unsatisfied | Unsatisfied | Neither<br>satisfied nor<br>unsatisfied | Satisfied | Very<br>satisfied |
| 1                   | 2           | 3                                       | 4         | 5                 |

1.3. How do you feel about your physical health?

|                     |             |                                         |           |                   |
|---------------------|-------------|-----------------------------------------|-----------|-------------------|
| Very<br>unsatisfied | Unsatisfied | Neither<br>satisfied nor<br>unsatisfied | Satisfied | Very<br>satisfied |
| 1                   | 2           | 3                                       | 4         | 5                 |

1.4. How do you feel about your practice of physical activities?

|                     |             |                                         |           |                   |
|---------------------|-------------|-----------------------------------------|-----------|-------------------|
| Very<br>unsatisfied | Unsatisfied | Neither<br>satisfied nor<br>unsatisfied | Satisfied | Very<br>satisfied |
| 1                   | 2           | 3                                       | 4         | 5                 |

1.5. Regarding your pain and/or discomfort and/or fatigue (tiredness), how do you feel?

|                     |             |                                         |           |                   |
|---------------------|-------------|-----------------------------------------|-----------|-------------------|
| Very<br>unsatisfied | Unsatisfied | Neither<br>satisfied nor<br>unsatisfied | Satisfied | Very<br>satisfied |
| 1                   | 2           | 3                                       | 4         | 5                 |

## 2. Emotional and Psychological

2.1. How do you feel about your mental/psychological health?

|                     |             |                                         |           |                   |
|---------------------|-------------|-----------------------------------------|-----------|-------------------|
| Very<br>unsatisfied | Unsatisfied | Neither<br>satisfied nor<br>unsatisfied | Satisfied | Very<br>satisfied |
| 1                   | 2           | 3                                       | 4         | 5                 |

2.2. How do you feel about your emotional and psychological state?

|                     |             |                                         |           |                   |
|---------------------|-------------|-----------------------------------------|-----------|-------------------|
| Very<br>unsatisfied | Unsatisfied | Neither<br>satisfied nor<br>unsatisfied | Satisfied | Very<br>satisfied |
| 1                   | 2           | 3                                       | 4         | 5                 |

2.3. Regarding your self-esteem, how do you feel?

|                     |             |                                         |           |                   |
|---------------------|-------------|-----------------------------------------|-----------|-------------------|
| Very<br>unsatisfied | Unsatisfied | Neither<br>satisfied nor<br>unsatisfied | Satisfied | Very<br>satisfied |
| 1                   | 2           | 3                                       | 4         | 5                 |

2.4. How do you feel about your motivation?

|                     |             |                                         |           |                   |
|---------------------|-------------|-----------------------------------------|-----------|-------------------|
| Very<br>unsatisfied | Unsatisfied | Neither<br>satisfied nor<br>unsatisfied | Satisfied | Very<br>satisfied |
| 1                   | 2           | 3                                       | 4         | 5                 |

2.5. Regarding positive feelings, how do you feel?

|                     |             |                                         |           |                   |
|---------------------|-------------|-----------------------------------------|-----------|-------------------|
| Very<br>unsatisfied | Unsatisfied | Neither<br>satisfied nor<br>unsatisfied | Satisfied | Very<br>satisfied |
| 1                   | 2           | 3                                       | 4         | 5                 |

2.6. How do you feel about your social life (social level, conviviality, cultural level)?

|                     |             |                                         |           |                   |
|---------------------|-------------|-----------------------------------------|-----------|-------------------|
| Very<br>unsatisfied | Unsatisfied | Neither<br>satisfied nor<br>unsatisfied | Satisfied | Very<br>satisfied |
| 1                   | 2           | 3                                       | 4         | 5                 |

## 3. Spiritual

3.1. Regarding your spiritual beliefs, how do you feel?

|                     |             |                                         |           |                   |
|---------------------|-------------|-----------------------------------------|-----------|-------------------|
| Very<br>unsatisfied | Unsatisfied | Neither<br>satisfied nor<br>unsatisfied | Satisfied | Very<br>satisfied |
|---------------------|-------------|-----------------------------------------|-----------|-------------------|

|   |   |   |   |   |
|---|---|---|---|---|
| 1 | 2 | 3 | 4 | 5 |
|---|---|---|---|---|

3.2. Regarding your personal values giving meaning to your life, how do you feel?

|                     |             |                                         |           |                   |
|---------------------|-------------|-----------------------------------------|-----------|-------------------|
| Very<br>unsatisfied | Unsatisfied | Neither<br>satisfied nor<br>unsatisfied | Satisfied | Very<br>satisfied |
| 1                   | 2           | 3                                       | 4         | 5                 |

3.3. Regarding your personal beliefs granting you the strength to understand and face hardships in your life, how do you feel?

|                     |             |                                         |           |                   |
|---------------------|-------------|-----------------------------------------|-----------|-------------------|
| Very<br>unsatisfied | Unsatisfied | Neither<br>satisfied nor<br>unsatisfied | Satisfied | Very<br>satisfied |
| 1                   | 2           | 3                                       | 4         | 5                 |

#### 4. Sleep and Rest

4.1. Regarding your sleep and rest, how do you feel?

|                     |             |                                         |           |                   |
|---------------------|-------------|-----------------------------------------|-----------|-------------------|
| Very<br>unsatisfied | Unsatisfied | Neither<br>satisfied nor<br>unsatisfied | Satisfied | Very<br>satisfied |
| 1                   | 2           | 3                                       | 4         | 5                 |

#### 5. Work and Life

5.1. How satisfied are you with the influence of your work on your life routine and family life?

|                     |             |                                         |           |                   |
|---------------------|-------------|-----------------------------------------|-----------|-------------------|
| Very<br>unsatisfied | Unsatisfied | Neither<br>satisfied nor<br>unsatisfied | Satisfied | Very<br>satisfied |
| 1                   | 2           | 3                                       | 4         | 5                 |

5.2. How satisfied are you with the impact of your work on your life and leisure?

|                     |             |                                         |           |                   |
|---------------------|-------------|-----------------------------------------|-----------|-------------------|
| Very<br>unsatisfied | Unsatisfied | Neither<br>satisfied nor<br>unsatisfied | Satisfied | Very<br>satisfied |
| 1                   | 2           | 3                                       | 4         | 5                 |

5.3. How satisfied are you with your work schedule, work routine, and rest?

|                     |             |                                         |           |                   |
|---------------------|-------------|-----------------------------------------|-----------|-------------------|
| Very<br>unsatisfied | Unsatisfied | Neither<br>satisfied nor<br>unsatisfied | Satisfied | Very<br>satisfied |
| 1                   | 2           | 3                                       | 4         | 5                 |

#### 6. Work Conditions

6.1. How satisfied are you with the physical work environment (weather, noise, pollution, contamination, cleanliness)?

|                     |             |                                         |           |                   |
|---------------------|-------------|-----------------------------------------|-----------|-------------------|
| Very<br>unsatisfied | Unsatisfied | Neither<br>satisfied nor<br>unsatisfied | Satisfied | Very<br>satisfied |
| 1                   | 2           | 3                                       | 4         | 5                 |

6.2. Regarding the work conditions (wellness/safety) offered by the company, how do you feel?

|                     |             |                                         |           |                   |
|---------------------|-------------|-----------------------------------------|-----------|-------------------|
| Very<br>unsatisfied | Unsatisfied | Neither<br>satisfied nor<br>unsatisfied | Satisfied | Very<br>satisfied |
| 1                   | 2           | 3                                       | 4         | 5                 |

6.3. How satisfied are you with the safety equipment (individual protection (PPE) and collective protection (CPE)) made available by the company?

|                     |             |                                         |           |                   |
|---------------------|-------------|-----------------------------------------|-----------|-------------------|
| Very<br>unsatisfied | Unsatisfied | Neither<br>satisfied nor<br>unsatisfied | Satisfied | Very<br>satisfied |
| 1                   | 2           | 3                                       | 4         | 5                 |

## 7. Leadership Management

7.1. Regarding the work pace (speed and manner of execution) conducted by the company, how do you feel?

|                     |             |                                         |           |                   |
|---------------------|-------------|-----------------------------------------|-----------|-------------------|
| Very<br>unsatisfied | Unsatisfied | Neither<br>satisfied nor<br>unsatisfied | Satisfied | Very<br>satisfied |
| 1                   | 2           | 3                                       | 4         | 5                 |

7.2. How do you feel about the clarity of the goals, objectives, and activities developed in the company?

|                     |             |                                         |           |                   |
|---------------------|-------------|-----------------------------------------|-----------|-------------------|
| Very<br>unsatisfied | Unsatisfied | Neither<br>satisfied nor<br>unsatisfied | Satisfied | Very<br>satisfied |
| 1                   | 2           | 3                                       | 4         | 5                 |

7.3. How do you feel about the actions and the support provided by your direct superior (boss/leader) in the company?

|                     |             |                                         |           |                   |
|---------------------|-------------|-----------------------------------------|-----------|-------------------|
| Very<br>unsatisfied | Unsatisfied | Neither<br>satisfied nor<br>unsatisfied | Satisfied | Very<br>satisfied |
| 1                   | 2           | 3                                       | 4         | 5                 |

7.4. How do you feel about the performance of your direct superior (boss/leader) in mediating the existing conflicts in the company?

|                     |             |                                         |           |                   |
|---------------------|-------------|-----------------------------------------|-----------|-------------------|
| Very<br>unsatisfied | Unsatisfied | Neither<br>satisfied nor<br>unsatisfied | Satisfied | Very<br>satisfied |
| 1                   | 2           | 3                                       | 4         | 5                 |

7.5. How satisfied are you with the company’s personal appreciation for you?

|                     |             |                                         |           |                   |
|---------------------|-------------|-----------------------------------------|-----------|-------------------|
| Very<br>unsatisfied | Unsatisfied | Neither<br>satisfied nor<br>unsatisfied | Satisfied | Very<br>satisfied |
| 1                   | 2           | 3                                       | 4         | 5                 |

7.6. How do you feel about the opportunity for growth (job promotions and/or career plan) offered by the company?

|                     |             |                                         |           |                   |
|---------------------|-------------|-----------------------------------------|-----------|-------------------|
| Very<br>unsatisfied | Unsatisfied | Neither<br>satisfied nor<br>unsatisfied | Satisfied | Very<br>satisfied |
| 1                   | 2           | 3                                       | 4         | 5                 |

7.7. How do you feel about the autonomy that the company grants you to make decisions?

|                     |             |                                         |           |                   |
|---------------------|-------------|-----------------------------------------|-----------|-------------------|
| Very<br>unsatisfied | Unsatisfied | Neither<br>satisfied nor<br>unsatisfied | Satisfied | Very<br>satisfied |
| 1                   | 2           | 3                                       | 4         | 5                 |

7.8. Regarding teamwork in the company, how do you feel?

|                     |             |                                         |           |                   |
|---------------------|-------------|-----------------------------------------|-----------|-------------------|
| Very<br>unsatisfied | Unsatisfied | Neither<br>satisfied nor<br>unsatisfied | Satisfied | Very<br>satisfied |
| 1                   | 2           | 3                                       | 4         | 5                 |

7.9. How satisfied are you with the feedback about your performance (knowing your performance)?

|                     |             |                                         |           |                   |
|---------------------|-------------|-----------------------------------------|-----------|-------------------|
| Very<br>unsatisfied | Unsatisfied | Neither<br>satisfied nor<br>unsatisfied | Satisfied | Very<br>satisfied |
| 1                   | 2           | 3                                       | 4         | 5                 |

**8. Remuneration and Functional Assistance**

8.1. How satisfied are you with your remuneration (salary plus benefits, profit sharing)?

|                     |             |                                         |           |                   |
|---------------------|-------------|-----------------------------------------|-----------|-------------------|
| Very<br>unsatisfied | Unsatisfied | Neither<br>satisfied nor<br>unsatisfied | Satisfied | Very<br>satisfied |
| 1                   | 2           | 3                                       | 4         | 5                 |

8.2. How satisfied are you with the assistance benefits (food, transportation, medical assistance, dental assistance) offered by the company?

|                     |             |                                         |           |                   |
|---------------------|-------------|-----------------------------------------|-----------|-------------------|
| Very<br>unsatisfied | Unsatisfied | Neither<br>satisfied nor<br>unsatisfied | Satisfied | Very<br>satisfied |
| 1                   | 2           | 3                                       | 4         | 5                 |

8.3. How do you feel about the assistance provided by the company in a problem that you face?

|                     |             |                                         |           |                   |
|---------------------|-------------|-----------------------------------------|-----------|-------------------|
| Very<br>unsatisfied | Unsatisfied | Neither<br>satisfied nor<br>unsatisfied | Satisfied | Very<br>satisfied |
| 1                   | 2           | 3                                       | 4         | 5                 |

8.4. Regarding educational assistance (studies, courses, training, university) offered by the company, how do you feel?

|                     |             |                                         |           |                   |
|---------------------|-------------|-----------------------------------------|-----------|-------------------|
| Very<br>unsatisfied | Unsatisfied | Neither<br>satisfied nor<br>unsatisfied | Satisfied | Very<br>satisfied |
| 1                   | 2           | 3                                       | 4         | 5                 |

8.5. How satisfied are you with the health assistance (physical or mental) offered by the company?

|                     |             |                                         |           |                   |
|---------------------|-------------|-----------------------------------------|-----------|-------------------|
| Very<br>unsatisfied | Unsatisfied | Neither<br>satisfied nor<br>unsatisfied | Satisfied | Very<br>satisfied |
| 1                   | 2           | 3                                       | 4         | 5                 |

8.6. How satisfied are you with the respect to labor rights demonstrated by the company?

|                     |             |                                         |           |                   |
|---------------------|-------------|-----------------------------------------|-----------|-------------------|
| Very<br>unsatisfied | Unsatisfied | Neither<br>satisfied nor<br>unsatisfied | Satisfied | Very<br>satisfied |
| 1                   | 2           | 3                                       | 4         | 5                 |

8.7. How satisfied are you with the norms and rules of your work?

|                     |             |                                         |           |                   |
|---------------------|-------------|-----------------------------------------|-----------|-------------------|
| Very<br>unsatisfied | Unsatisfied | Neither<br>satisfied nor<br>unsatisfied | Satisfied | Very<br>satisfied |
| 1                   | 2           | 3                                       | 4         | 5                 |

8.8. How satisfied are you with the organizational structure provided for the execution of your job?

|                     |             |                                         |           |                   |
|---------------------|-------------|-----------------------------------------|-----------|-------------------|
| Very<br>unsatisfied | Unsatisfied | Neither<br>satisfied nor<br>unsatisfied | Satisfied | Very<br>satisfied |
| 1                   | 2           | 3                                       | 4         | 5                 |

8.9. How satisfied are you with the company's responsibility for the employees?

|                     |             |                                         |           |                   |
|---------------------|-------------|-----------------------------------------|-----------|-------------------|
| Very<br>unsatisfied | Unsatisfied | Neither<br>satisfied nor<br>unsatisfied | Satisfied | Very<br>satisfied |
| 1                   | 2           | 3                                       | 4         | 5                 |

## 9. Functional Responsibility

9.1. Regarding the responsibility assigned to you (work responsibility), how do you feel?

|                     |             |                                         |           |                   |
|---------------------|-------------|-----------------------------------------|-----------|-------------------|
| Very<br>unsatisfied | Unsatisfied | Neither<br>satisfied nor<br>unsatisfied | Satisfied | Very<br>satisfied |
| 1                   | 2           | 3                                       | 4         | 5                 |

9.2. Regarding your commitment to the company, how do you feel?

|                     |             |                                         |           |                   |
|---------------------|-------------|-----------------------------------------|-----------|-------------------|
| Very<br>unsatisfied | Unsatisfied | Neither<br>satisfied nor<br>unsatisfied | Satisfied | Very<br>satisfied |
| 1                   | 2           | 3                                       | 4         | 5                 |

9.3. Are you satisfied with your ability to carry out your task/job/activity in the company?

|                     |             |                                         |           |                   |
|---------------------|-------------|-----------------------------------------|-----------|-------------------|
| Very<br>unsatisfied | Unsatisfied | Neither<br>satisfied nor<br>unsatisfied | Satisfied | Very<br>satisfied |
| 1                   | 2           | 3                                       | 4         | 5                 |

9.4. Regarding versatility (the possibility to perform several tasks and jobs), how do you feel?

|                     |             |                                         |           |                   |
|---------------------|-------------|-----------------------------------------|-----------|-------------------|
| Very<br>unsatisfied | Unsatisfied | Neither<br>satisfied nor<br>unsatisfied | Satisfied | Very<br>satisfied |
| 1                   | 2           | 3                                       | 4         | 5                 |

9.5. How do you feel about the communication that takes place in the company?

|                     |             |                                         |           |                   |
|---------------------|-------------|-----------------------------------------|-----------|-------------------|
| Very<br>unsatisfied | Unsatisfied | Neither<br>satisfied nor<br>unsatisfied | Satisfied | Very<br>satisfied |
| 1                   | 2           | 3                                       | 4         | 5                 |

9.6. Regarding the information flow (how the communication occurs), how do you feel?

|                     |             |                                         |           |                   |
|---------------------|-------------|-----------------------------------------|-----------|-------------------|
| Very<br>unsatisfied | Unsatisfied | Neither<br>satisfied nor<br>unsatisfied | Satisfied | Very<br>satisfied |
| 1                   | 2           | 3                                       | 4         | 5                 |

### 10. Personal Relations and Company Image

10.1. How satisfied are you with your personal relationships (friends, colleagues, bosses) in the company?

|                     |             |                                         |           |                   |
|---------------------|-------------|-----------------------------------------|-----------|-------------------|
| Very<br>unsatisfied | Unsatisfied | Neither<br>satisfied nor<br>unsatisfied | Satisfied | Very<br>satisfied |
| 1                   | 2           | 3                                       | 4         | 5                 |

10.2. Regarding discrimination (social, racial, religious, sexual, among others) at your work, how do you feel?

|                     |             |                                         |           |                   |
|---------------------|-------------|-----------------------------------------|-----------|-------------------|
| Very<br>unsatisfied | Unsatisfied | Neither<br>satisfied nor<br>unsatisfied | Satisfied | Very<br>satisfied |
| 1                   | 2           | 3                                       | 4         | 5                 |

10.3. How satisfied are you with your ability to learn new information?

|                     |             |                                         |           |                   |
|---------------------|-------------|-----------------------------------------|-----------|-------------------|
| Very<br>unsatisfied | Unsatisfied | Neither<br>satisfied nor<br>unsatisfied | Satisfied | Very<br>satisfied |
| 1                   | 2           | 3                                       | 4         | 5                 |

10.4. How satisfied are you with the image of the company to its employees and society?

|                     |             |                                         |           |                   |
|---------------------|-------------|-----------------------------------------|-----------|-------------------|
| Very<br>unsatisfied | Unsatisfied | Neither<br>satisfied nor<br>unsatisfied | Satisfied | Very<br>satisfied |
| 1                   | 2           | 3                                       | 4         | 5                 |

10.5. Regarding your identification with the company (work relation, products, and policies), how do you feel?

|                     |             |                                         |           |                   |
|---------------------|-------------|-----------------------------------------|-----------|-------------------|
| Very<br>unsatisfied | Unsatisfied | Neither<br>satisfied nor<br>unsatisfied | Satisfied | Very<br>satisfied |
| 1                   | 2           | 3                                       | 4         | 5                 |
